# Supplementary material
Source: MDPI journal article supplement (https://www.mdpi.com/2218-2004/6/1/10)
Supplement: s1 [file s1]

Archive with 2 entries (2 files):
- atoms-271811-author reply to reviewer 1.pdf
- atoms-271811-reviewer 1.pdf
