# Supplementary material
Source: MDPI journal article supplement (https://www.mdpi.com/2218-2004/6/1/10)
Supplement: s1 [file s1]

Dear authors, editor,

I reviewed the manuscript "STARK BROADENING OF Se IV, Sn IV, Sb IV AND Te IV SPECTRAL LINES," Milan S. Dimitrijević, Zoran Simić, Roland Stamm, Joël Rosato, Nenad Milovanović, Cristina Yubero, for consideration of publication in *Atoms*.

The manuscript communicates accurate calculations of Stark broadened lines for especially astrophysical applications, for example, in modeling of star atmospheres and measurement of spectra. There are also applications in the study of laser-produced plasma. The content fits well with the *Atoms* journal.

Please let me communicate a few points for consideration of inclusion in the submitted manuscript:

1. The theoretical resolving power of the high-resolution echelle spectrometer for the Keck Ten-Meter Telescope is of the order of  $> 250,000$ . However, practical realizations may be  $\sim 36,000$ . At wavelengths,  $\lambda$ , of 500 and 4000 Å, the resolution,  $\Delta\lambda$ , would be 0.014 and 0.11 Å, respectively. It will be helpful to include a remark regarding resolving power needed to measure reasonably well the indicated Stark widths 80 kK.
2. It will also help to include (perhaps as a footnote) in Table 1, or near line 30 on page 2, values for the Doppler broadening at, say 80 kK, for comparison with the predicted values
3. Line 36, page 2: The classification may be DZ (or if unclear DX); and line 36, page 2, A-type stars appear to show temperatures  $< 12$  kK, so, please edit and use suggested nomenclature.
4. There are just a few edits/grammar, e.g., lines 121 on page 5: ", i.e.," and next line 121 "Contrary," or line 127, "corresponding".
5. On page 5, line 126, comments RE accuracy of Stark widths: I understand that this is  $\pm 11\%$  or  $\pm 30\%$ , how does this affect the needed resolution for, say, the echelle in point 1.

Overall, I think this is a valuable contribution for modeling stellar atmospheres of, for instance, White Dwarfs. I recommend only minor edits along the lines above.

Respectfully
