# Supplementary material
Source: MDPI journal article supplement (https://www.mdpi.com/2218-2004/6/1/10)
Supplement: s2 [file s2]

I recommend the manuscript "STARK BROADENING OF Se IV, Sn IV, Sb IV AND Te IV SPECTRAL LINES' for publication in Journal 'Atoms'.

Suggestion: Inclusion of the Stark shifts of investigating ion transitions calculated in MSE formalism (Ref. 36) will be a valuable complement for the readers.
