# Supplementary material
Source: MDPI journal article supplement (https://www.mdpi.com/2218-2004/6/1/10)
Supplement: s2 [file s2]

We are very grateful to reviewer for suggestion. However, as the difference from width calculation, where all contributions are positive, for shifts they can be positive and negative, due to mutual cancellations their accuracy is smaller, particularly for s-p transitions, which is the case of the most interesting line 4217.3 Å, where the contribution of s level is only negative. In order to calculate shifts reliably, more sophisticated methods are needed like semiclassical perturbation approach which is not applicable in the present case. Since MSE method is approximate, values of shift are not so reliable, particularly for 4217.3 Å line, and we prefer to not present them.
